# Supplementary material for: Do ternary liquid mixtures exhibit negative main Fick diffusion coefficients?
Source: Royal Society of Chemistry journal article supplement (doi:10.1039/c8cp06795c), 2019-01-01
Supplement: c8cp06795c1.pdf [file c8cp06795c1.pdf]

## Supplementary material to: Do ternary liquid mixtures exhibit negative main Fick diffusion coefficients?

S. Kozlova<sup>1</sup>, A. Mialdun<sup>2</sup>, I. Ryzhkov<sup>1,4</sup>, T. Janzen<sup>3</sup>, J. Vrabec<sup>3</sup> and V. Shevtsova<sup>2</sup>

<sup>1</sup>*Institute of Computational Modelling SB RAS,  
50/44 Akademgorodok, 660036, Krasnoyarsk, Russia*

<sup>2</sup>*Microgravity Research Center, Université Libre de Bruxelles (ULB),  
CP-165/62, Av. F.D. Roosevelt, 50, B-1050 Brussels, Belgium*

*Thermodynamics and Thermal Process Engineering, Technical University  
Berlin,  
Ernst-Reuter-Platz 1, 10587 Berlin, Germany*

<sup>4</sup>*Siberian Federal University  
79 Svobodny pr., 660041, Krasnoyarsk, Russia*

### 1 Partial molar volumes of a binary mixture

The molar volume of a binary liquid mixture at constant temperature and pressure is in general given by

$$v = x_1v_1 + x_2v_2, \quad (1)$$

On the other hand, the molar volume of a *volumetrically ideal* binary mixture is

$$v = \frac{M}{\rho} = \frac{x_1M_1}{\rho} + \frac{x_2M_2}{\rho} = x_1v_1^0 + x_2v_2^0, \quad (2)$$

where  $M$  and  $M_i$  are the molar mass of the mixture and its components.

In a *volumetrically non-ideal* mixture, the total volume is not the weighted sum of the pure component volumes  $v_i^0$  and the partial molar volumes  $v_i$  depend on mixture composition such that they can be smaller or larger than  $v_i^0$  due to volumetric contraction or dilatation.

Considering Eq. (1) under isothermal-isobaric conditions leads to

$$dv = x_1dv_1 + v_1dx_1 + x_2dv_2 + v_2dx_2. \quad (3)$$

The Gibbs-Duhem equation yields  $x_1dv_1 + x_2dv_2 = 0$  so that

$$dv = v_1dx_1 + v_2dx_2. \quad (4)$$

From the closure  $x_1 + x_2 = 1$ , it follows that  $dx_1 = -dx_2$ . Substituting this into Eq. (4) yields  $dv = v_1dx_1 - v_2dx_1$  and

$$\frac{dv}{dx_1} = v_1 - v_2 = v_1 - \frac{v - x_1v_1}{x_2}, \quad (5)$$

considering Eq. (1). Finally,

$$v_1 = v + (1 - x_1) \frac{dv}{dx_1}. \quad (6)$$

Accordingly, the values of  $v_1$  and  $v_2$  obviously depend on mixture composition.

## 2 Examined compositions

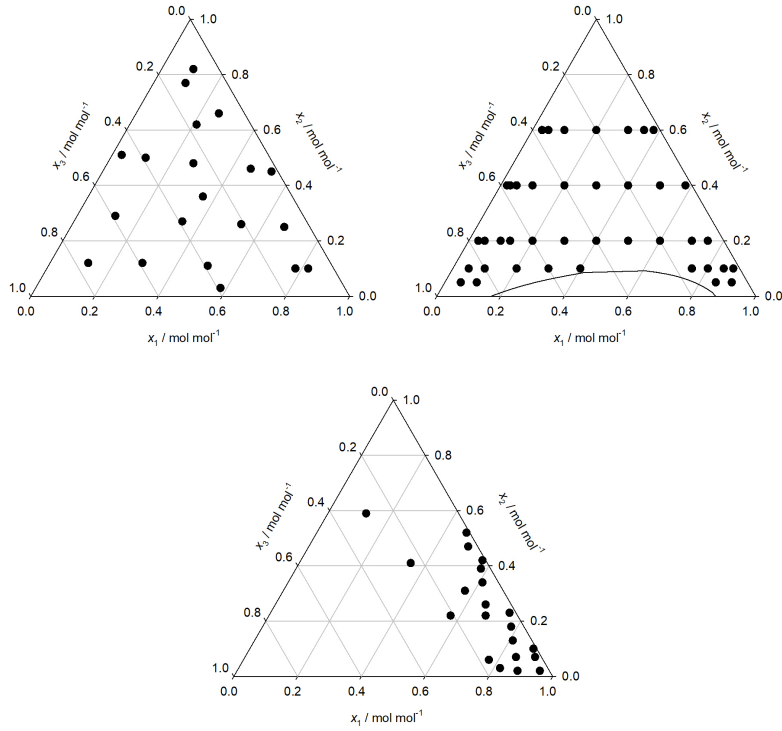

Figure 1: Compositions in terms of mole fractions at which their diffusion coefficients were measured : (a) THN – IBB – nC<sub>12</sub>; (b) cyclohexane – toluene – methanol; (c) water – ethanol – TEG.

## 3 Tabular data for examined mixtures

Table 1: Ternary mixture THN (1) – IBB (2) – nC<sub>12</sub>(3): specific density  $\rho$  kg/m<sup>3</sup>, the molar volume  $v$  cm<sup>3</sup>/mol calculated by Eq. (18), their diffusion coefficients  $D_{ij}^V/10^{-10}$  m<sup>2</sup>/s measured at T=298.15 and normal pressure in the volume reference frame [1, 2] and transferred to the molar and mass reference frames.

| #  | $x_1$ | $x_2$ | $\rho$ | $v$     | volume     |            |            |            |            |            | mass       |            |            |            |            |            | molar |  |  |  |  |  |
|----|-------|-------|--------|---------|------------|------------|------------|------------|------------|------------|------------|------------|------------|------------|------------|------------|-------|--|--|--|--|--|
|    |       |       |        |         | $D_{11}^V$ | $D_{12}^V$ | $D_{21}^V$ | $D_{22}^V$ | $D_{11}^m$ | $D_{12}^m$ | $D_{21}^m$ | $D_{22}^m$ | $D_{11}^M$ | $D_{12}^M$ | $D_{21}^M$ | $D_{22}^M$ |       |  |  |  |  |  |
| 1  | 0.03  | 0.51  | 798.73 | 190.12  | 12.69      | 0.32       | -4.88      | 8.70       | 12.74      | 0.35       | -5.13      | 8.65       | 12.83      | 0.42       | -5.02      | 8.56       |       |  |  |  |  |  |
| 2  | 0.10  | 0.77  | 845.14 | 165.22  | 11.36      | 0.12       | -2.84      | 8.55       | 11.43      | 0.17       | -3.18      | 8.48       | 11.55      | 0.28       | -3.23      | 8.36       |       |  |  |  |  |  |
| 3  | 0.10  | 0.82  | 850.33 | 161.66  | 10.80      | -0.13      | -1.85      | 9.13       | 10.80      | -0.11      | -2.04      | 9.12       | 10.83      | -0.09      | -2.02      | 9.10       |       |  |  |  |  |  |
| 4  | 0.11  | 0.50  | 814.08 | 183.44  | 12.44      | 0.33       | -5.17      | 8.15       | 12.55      | 0.39       | -5.54      | 8.05       | 12.75      | 0.56       | -5.54      | 7.85       |       |  |  |  |  |  |
| 5  | 0.12  | 0.12  | 777.82 | 209.20  | 11.33      | -0.17      | -3.80      | 9.03       | 11.37      | -0.14      | -3.95      | 8.98       | 11.47      | -0.08      | -3.97      | 8.88       |       |  |  |  |  |  |
| 6  | 0.12  | 0.29  | 793.37 | 197.31  | 11.48      | 0.13       | -4.44      | 7.85       | 11.54      | 0.18       | -4.68      | 7.79       | 11.68      | 0.29       | -4.70      | 7.65       |       |  |  |  |  |  |
| 7  | 0.21  | 0.62  | 851.54 | 165.70  | 12.66      | 1.46       | -6.48      | 5.63       | 13.06      | 1.68       | -7.45      | 5.22       | 13.75      | 2.31       | -7.93      | 4.54       |       |  |  |  |  |  |
| 8  | 0.26  | 0.66  | 867.68 | 158.22  | 10.86      | 0.98       | -3.91      | 6.20       | 11.17      | 1.15       | -4.66      | 5.89       | 11.69      | 1.65       | -5.10      | 5.37       |       |  |  |  |  |  |
| 9  | 0.27  | 0.48  | 846.97 | 170.093 | 11.55      | 1.07       | -5.52      | 5.77       | 11.86      | 1.24       | -6.28      | 5.46       | 12.44      | 1.77       | -6.71      | 4.88       |       |  |  |  |  |  |
| 10 | 0.29  | 0.12  | 810.73 | 193.63  | 10.46      | 0.04       | -3.98      | 7.47       | 10.59      | 0.13       | -4.30      | 7.34       | 10.89      | 0.36       | -4.52      | 7.05       |       |  |  |  |  |  |
| 11 | 0.34  | 0.27  | 837.22 | 178.49  | 10.72      | 0.31       | -5.19      | 6.61       | 10.95      | 0.46       | -5.75      | 6.37       | 11.44      | 0.84       | -6.10      | 5.88       |       |  |  |  |  |  |
| 12 | 0.36  | 0.36  | 853.14 | 170.29  | 10.09      | 0.40       | -4.07      | 6.33       | 10.31      | 0.55       | -4.61      | 6.10       | 10.77      | 0.94       | -4.98      | 5.64       |       |  |  |  |  |  |
| 13 | 0.46  | 0.46  | 890.83 | 153.96  | 9.89       | 0.83       | -4.26      | 5.30       | 10.27      | 1.07       | -5.12      | 4.91       | 11.03      | 1.74       | -5.78      | 4.16       |       |  |  |  |  |  |
| 14 | 0.50  | 0.11  | 854.57 | 175.07  | 8.12       | -0.30      | -2.61      | 6.64       | 8.27       | -0.18      | -2.95      | 6.49       | 8.62       | 0.06       | -3.26      | 6.14       |       |  |  |  |  |  |
| 15 | 0.53  | 0.26  | 881.08 | 161.71  | 8.32       | 0.22       | -3.46      | 5.23       | 8.59       | 0.41       | -4.06      | 4.96       | 9.16       | 0.89       | -4.56      | 4.39       |       |  |  |  |  |  |
| 16 | 0.53  | 0.45  | 906.18 | 148.21  | 8.81       | 1.00       | -2.35      | 5.29       | 9.12       | 1.18       | -3.00      | 4.98       | 9.70       | 1.75       | -3.57      | 4.40       |       |  |  |  |  |  |
| 17 | 0.58  | 0.03  | 862.68 | 173.38  | 7.03       | -0.03      | -0.63      | 6.26       | 7.08       | 0.03       | -0.73      | 6.22       | 7.18       | 0.15       | -0.83      | 6.11       |       |  |  |  |  |  |
| 18 | 0.67  | 0.25  | 913.97 | 149.54  | 8.15       | 0.44       | -2.91      | 5.04       | 8.47       | 0.66       | -3.59      | 4.72       | 9.14       | 1.26       | -4.22      | 4.05       |       |  |  |  |  |  |
| 19 | 0.78  | 0.10  | 920.69 | 150.08  | 6.99       | -0.56      | -2.02      | 6.00       | 7.20       | -0.35      | -2.47      | 5.78       | 7.69       | 0.02       | -2.93      | 5.30       |       |  |  |  |  |  |
| 20 | 0.82  | 0.10  | 931.33 | 146.40  | 6.56       | -0.76      | -1.31      | 6.25       | 6.70       | -0.58      | -1.62      | 6.11       | 7.03       | -0.32      | -1.93      | 5.78       |       |  |  |  |  |  |

Table 2: Ternary mixture cyclohexane (1)+ toluene (2)+ methanol (3): specific density  $\rho$  kg/m<sup>3</sup>, the molar volume  $v$  cm<sup>3</sup>/mol calculated by Eq. (21), their diffusion coefficients  $D_{ij}^V/10^{-10}$  m<sup>2</sup>/s measured at T=298.15 and normal pressure in the volume reference frame [3, 4, 5] and transferred to the molar and mass reference frames.

| #N | volume |       |        | mass       |            |            |            |            |            | molar      |            |            |            |            |            |      |
|----|--------|-------|--------|------------|------------|------------|------------|------------|------------|------------|------------|------------|------------|------------|------------|------|
|    | $x_1$  | $x_2$ | $v$    | $D_{11}^V$ | $D_{12}^V$ | $D_{21}^V$ | $D_{22}^V$ | $D_{11}^m$ | $D_{12}^m$ | $D_{21}^m$ | $D_{22}^m$ | $D_{11}^M$ | $D_{12}^M$ | $D_{21}^M$ | $D_{22}^M$ |      |
| 1  | 0.02   | 0.40  | 832.58 | 68.57      | 1.89       | -0.13      | -1.34      | 0.91       | 1.89       | -0.12      | -1.37      | 0.90       | 1.90       | -0.11      | -1.48      | 0.89 |
| 2  | 0.03   | 0.20  | 813.98 | 56.08      | 1.85       | -0.07      | -0.99      | 1.25       | 1.85       | -0.07      | -1.05      | 1.25       | 1.83       | -0.07      | -1.08      | 1.27 |
| 3  | 0.03   | 0.20  | 813.98 | 56.08      | 1.93       | -0.05      | -1.02      | 1.24       | 1.93       | -0.04      | -1.07      | 1.24       | 1.91       | -0.06      | -1.09      | 1.26 |
| 4  | 0.03   | 0.40  | 832.57 | 69.27      | 1.98       | -0.16      | -1.35      | 0.94       | 1.98       | -0.15      | -1.39      | 0.94       | 2.01       | -0.13      | -1.47      | 0.91 |
| 5  | 0.03   | 0.60  | 844.93 | 82.49      | 1.82       | -0.22      | -1.20      | 0.94       | 1.83       | -0.21      | -1.21      | 0.94       | 1.91       | -0.14      | -1.36      | 0.86 |
| 6  | 0.05   | 0.05  | 790.68 | 47.61      | 1.65       | -0.10      | -0.38      | 1.80       | 1.65       | -0.09      | -0.41      | 1.80       | 1.63       | -0.09      | -0.39      | 1.83 |
| 7  | 0.05   | 0.05  | 790.74 | 47.61      | 1.72       | -0.03      | -0.36      | 1.85       | 1.72       | -0.03      | -0.39      | 1.85       | 1.70       | -0.02      | -0.38      | 1.88 |
| 8  | 0.05   | 0.10  | 798.65 | 50.90      | 1.67       | -0.13      | -0.61      | 1.61       | 1.67       | -0.12      | -0.65      | 1.61       | 1.64       | -0.12      | -0.65      | 1.64 |
| 9  | 0.05   | 0.20  | 811.68 | 57.49      | 1.39       | -0.33      | -0.56      | 1.42       | 1.40       | -0.31      | -0.59      | 1.41       | 1.43       | -0.27      | -0.68      | 1.38 |
| 10 | 0.05   | 0.20  | 811.68 | 57.49      | 1.38       | -0.37      | -0.54      | 1.45       | 1.38       | -0.35      | -0.57      | 1.44       | 1.43       | -0.30      | -0.67      | 1.40 |
| 11 | 0.05   | 0.40  | 830.24 | 70.68      | 1.81       | -0.18      | -1.33      | 0.93       | 1.82       | -0.17      | -1.36      | 0.92       | 1.81       | -0.16      | -1.48      | 0.93 |
| 12 | 0.05   | 0.40  | 830.27 | 70.68      | 1.80       | -0.19      | -1.29      | 0.94       | 1.81       | -0.18      | -1.33      | 0.93       | 1.81       | -0.17      | -1.44      | 0.93 |
| 13 | 0.05   | 0.60  | 842.72 | 83.90      | 2.03       | -0.03      | -1.52      | 0.78       | 2.04       | -0.02      | -1.54      | 0.77       | 1.98       | -0.06      | -1.67      | 0.84 |
| 14 | 0.10   | 0.05  | 787.29 | 51.13      | 1.21       | -0.41      | -0.30      | 1.92       | 1.22       | -0.39      | -0.33      | 1.91       | 1.19       | -0.34      | -0.33      | 1.94 |
| 15 | 0.10   | 0.10  | 794.92 | 54.42      | 1.23       | -0.41      | -0.51      | 1.65       | 1.24       | -0.39      | -0.54      | 1.64       | 1.21       | -0.35      | -0.57      | 1.67 |
| 16 | 0.10   | 0.20  | 807.61 | 61.01      | 1.35       | -0.40      | -0.76      | 1.34       | 1.36       | -0.38      | -0.80      | 1.33       | 1.34       | -0.36      | -0.86      | 1.35 |
| 17 | 0.10   | 0.20  | 807.61 | 61.01      | 1.40       | -0.39      | -0.81      | 1.33       | 1.41       | -0.37      | -0.85      | 1.31       | 1.38       | -0.35      | -0.90      | 1.34 |
| 18 | 0.10   | 0.40  | 826.10 | 74.20      | 1.39       | -0.63      | -0.80      | 1.30       | 1.40       | -0.60      | -0.83      | 1.28       | 1.54       | -0.47      | -1.00      | 1.14 |
| 19 | 0.10   | 0.60  | 838.66 | 87.41      | 1.87       | -0.09      | -1.31      | 0.86       | 1.89       | -0.08      | -1.33      | 0.84       | 1.80       | -0.13      | -1.42      | 0.93 |
| 20 | 0.13   | 0.20  | 805.82 | 63.11      | 1.12       | -0.57      | -0.64      | 1.46       | 1.14       | -0.54      | -0.68      | 1.44       | 1.14       | -0.47      | -0.79      | 1.44 |
| 21 | 0.13   | 0.20  | 805.82 | 63.11      | 1.17       | -0.61      | -0.61      | 1.50       | 1.19       | -0.58      | -0.65      | 1.48       | 1.21       | -0.51      | -0.75      | 1.46 |
| 22 | 0.20   | 0.10  | 789.28 | 61.41      | 0.71       | -0.83      | -0.38      | 1.72       | 0.73       | -0.81      | -0.41      | 1.71       | 0.70       | -0.67      | -0.46      | 1.73 |
| 23 | 0.20   | 0.10  | 789.28 | 61.41      | 0.74       | -0.80      | -0.43      | 1.69       | 0.76       | -0.78      | -0.46      | 1.67       | 0.72       | -0.65      | -0.50      | 1.71 |
| 24 | 0.20   | 0.20  | 801.24 | 68.00      | 0.71       | -0.90      | -0.34      | 1.62       | 0.72       | -0.87      | -0.36      | 1.60       | 0.80       | -0.70      | -0.54      | 1.52 |
| 25 | 0.20   | 0.20  | 801.24 | 68.00      | 0.81       | -0.81      | -0.45      | 1.56       | 0.83       | -0.78      | -0.48      | 1.54       | 0.86       | -0.64      | -0.63      | 1.51 |
| 26 | 0.20   | 0.40  | 819.15 | 81.18      | 1.04       | -0.66      | -0.77      | 1.24       | 1.07       | -0.64      | -0.80      | 1.22       | 1.11       | -0.51      | -1.01      | 1.17 |
| 27 | 0.20   | 0.40  | 819.15 | 81.18      | 1.20       | -0.48      | -0.97      | 1.04       | 1.23       | -0.46      | -1.01      | 1.02       | 1.17       | -0.41      | -1.14      | 1.08 |
| 28 | 0.20   | 0.60  | 831.84 | 94.40      | 1.98       | 0.17       | -1.39      | 0.66       | 2.01       | 0.19       | -1.41      | 0.64       | 1.68       | -0.05      | -1.30      | 0.96 |

Table 3: DCMIX2 in different systems (continued).

| #  | $x_1$ | $x_2$ | $\rho$ | $v$    | volume     |            |            |            | mass       |            |            |            | molar      |            |            |            |
|----|-------|-------|--------|--------|------------|------------|------------|------------|------------|------------|------------|------------|------------|------------|------------|------------|
|    |       |       |        |        | $D_{11}^V$ | $D_{12}^V$ | $D_{21}^V$ | $D_{22}^V$ | $D_{11}^m$ | $D_{12}^m$ | $D_{21}^m$ | $D_{22}^m$ | $D_{11}^M$ | $D_{12}^M$ | $D_{21}^M$ | $D_{22}^M$ |
| 29 | 0.30  | 0.10  | 785.43 | 68.35  | 0.37       | -1.13      | 0.25       | 1.83       | 0.36       | -1.11      | 0.27       | 1.84       | 0.55       | -0.91      | 0.05       | 1.65       |
| 30 | 0.30  | 0.20  | 796.66 | 74.93  | 0.71       | -0.86      | -0.50      | 1.45       | 0.73       | -0.84      | -0.53      | 1.43       | 0.69       | -0.69      | -0.61      | 1.46       |
| 31 | 0.30  | 0.40  | 813.89 | 88.11  | 1.02       | -0.72      | -0.55      | 1.39       | 1.04       | -0.70      | -0.58      | 1.36       | 1.09       | -0.57      | -0.74      | 1.31       |
| 32 | 0.30  | 0.60  | 826.42 | 101.32 | 1.55       | -0.07      | -0.41      | 1.42       | 1.56       | -0.07      | -0.42      | 1.41       | 1.46       | -0.06      | -0.51      | 1.51       |
| 33 | 0.35  | 0.60  | 824.14 | 104.76 | 2.03       | 0.19       | -0.31      | 1.55       | 2.04       | 0.20       | -0.31      | 1.54       | 1.89       | 0.05       | -0.17      | 1.69       |
| 34 | 0.35  | 0.60  | 824.14 | 104.76 | 2.03       | 0.18       | -0.31      | 1.55       | 2.03       | 0.19       | -0.31      | 1.54       | 1.88       | 0.05       | -0.18      | 1.69       |
| 35 | 0.38  | 0.60  | 823.10 | 106.82 | 2.06       | -0.06      | 0.34       | 2.35       | 2.05       | -0.07      | 0.35       | 2.36       | 2.19       | 0.00       | 0.32       | 2.22       |
| 36 | 0.38  | 0.60  | 823.10 | 106.82 | 2.07       | -0.06      | 0.34       | 2.36       | 2.06       | -0.07      | 0.35       | 2.37       | 2.20       | 0.00       | 0.32       | 2.23       |
| 37 | 0.38  | 0.60  | 823.08 | 106.82 | 1.91       | -0.21      | 0.54       | 2.59       | 1.90       | -0.23      | 0.55       | 2.60       | 2.14       | -0.03      | 0.38       | 2.36       |
| 38 | 0.40  | 0.10  | 782.93 | 75.23  | 0.19       | -1.34      | -0.12      | 1.85       | 0.20       | -1.33      | -0.13      | 1.84       | 0.24       | -1.02      | -0.24      | 1.79       |
| 39 | 0.40  | 0.20  | 793.40 | 81.81  | 0.42       | -1.13      | -0.21      | 1.67       | 0.43       | -1.12      | -0.23      | 1.66       | 0.51       | -0.85      | -0.40      | 1.58       |
| 40 | 0.40  | 0.40  | 809.86 | 94.99  | 0.90       | -0.85      | -0.29      | 1.61       | 0.92       | -0.84      | -0.31      | 1.59       | 1.04       | -0.64      | -0.52      | 1.47       |
| 41 | 0.40  | 0.40  | 809.84 | 94.99  | 0.76       | -0.98      | -0.13      | 1.73       | 0.77       | -0.98      | -0.14      | 1.72       | 0.99       | -0.69      | -0.42      | 1.50       |
| 42 | 0.50  | 0.20  | 790.90 | 88.63  | 0.21       | -1.33      | 0.09       | 1.85       | 0.21       | -1.35      | 0.09       | 1.85       | 0.43       | -0.97      | -0.19      | 1.64       |
| 43 | 0.50  | 0.20  | 790.90 | 88.63  | 0.29       | -1.30      | 0.04       | 1.83       | 0.30       | -1.31      | 0.04       | 1.83       | 0.49       | -0.97      | -0.21      | 1.64       |
| 44 | 0.50  | 0.40  | 806.78 | 101.81 | 1.28       | -0.40      | -0.29      | 1.51       | 1.29       | -0.39      | -0.30      | 1.50       | 1.27       | -0.32      | -0.35      | 1.52       |
| 45 | 0.58  | 0.40  | 805.07 | 107.22 | 2.17       | -0.19      | 0.00       | 2.12       | 2.17       | -0.18      | 0.00       | 2.12       | 2.28       | -0.32      | 0.06       | 2.01       |
| 46 | 0.60  | 0.20  | 789.70 | 95.39  | 0.72       | -0.86      | -0.26      | 1.49       | 0.73       | -0.86      | -0.27      | 1.48       | 0.71       | -0.72      | -0.30      | 1.50       |
| 47 | 0.60  | 0.20  | 789.70 | 95.39  | 0.81       | -0.87      | -0.34      | 1.50       | 0.84       | -0.85      | -0.37      | 1.47       | 0.77       | -0.77      | -0.35      | 1.54       |
| 48 | 0.70  | 0.20  | 788.87 | 102.10 | 0.93       | -0.68      | -0.14      | 1.56       | 0.94       | -0.68      | -0.15      | 1.55       | 0.94       | -0.57      | -0.18      | 1.55       |
| 49 | 0.70  | 0.20  | 788.87 | 102.10 | 0.79       | -0.76      | -0.05      | 1.60       | 0.80       | -0.77      | -0.05      | 1.60       | 0.86       | -0.60      | -0.14      | 1.54       |
| 50 | 0.75  | 0.10  | 780.33 | 98.86  | 0.43       | -1.10      | -0.01      | 1.71       | 0.43       | -1.12      | -0.02      | 1.71       | 0.48       | -0.84      | -0.10      | 1.66       |
| 51 | 0.75  | 0.20  | 788.66 | 105.43 | 1.40       | 0.01       | -0.25      | 1.29       | 1.42       | 0.02       | -0.26      | 1.27       | 1.26       | 0.05       | -0.15      | 1.44       |
| 52 | 0.75  | 0.20  | 788.66 | 105.43 | 1.13       | -0.29      | -0.02      | 1.51       | 1.14       | -0.30      | -0.02      | 1.51       | 1.15       | -0.17      | -0.06      | 1.49       |
| 53 | 0.80  | 0.10  | 780.46 | 102.18 | 0.51       | -0.97      | 0.13       | 1.75       | 0.50       | -1.00      | 0.14       | 1.76       | 0.63       | -0.69      | -0.01      | 1.63       |
| 54 | 0.85  | 0.05  | 776.42 | 102.20 | 0.48       | -1.06      | 0.11       | 1.74       | 0.47       | -1.08      | 0.12       | 1.75       | 0.57       | -0.86      | 0.01       | 1.65       |
| 55 | 0.85  | 0.10  | 780.72 | 105.48 | 0.46       | -0.85      | 0.46       | 1.91       | 0.42       | -0.91      | 0.49       | 1.94       | 0.75       | -0.39      | 0.14       | 1.62       |
| 56 | 0.88  | 0.10  | 780.88 | 107.46 | 0.65       | -0.51      | 0.52       | 1.87       | 0.60       | -0.57      | 0.56       | 1.91       | 0.94       | 0.06       | 0.18       | 1.57       |
| 57 | 0.90  | 0.05  | 777.04 | 105.49 | 0.51       | -0.96      | 0.35       | 1.90       | 0.48       | -1.01      | 0.37       | 1.93       | 0.74       | -0.65      | 0.11       | 1.68       |

Table 4: Ternary mixture water (1)–ethanol (2)–triethylene glycol (3): specific density  $\rho$  kg/m<sup>3</sup>, the molar volumes  $v$  cm<sup>3</sup>/mol calculated by Eq. (22), their diffusion coefficients  $D_{ij}^V/10^{-10}$  m<sup>2</sup>/s measured at T=298.15 and normal pressure in the volume reference frame [6] and transferred to the molar and mass reference frames.

| #  | $x_1$ | $x_2$ | $\rho$  | $v_1$ | $v_2$ | $v_3$  | $v$   | volume     |            |            |            |            |            | mass       |            |            |            |            |            |
|----|-------|-------|---------|-------|-------|--------|-------|------------|------------|------------|------------|------------|------------|------------|------------|------------|------------|------------|------------|
|    |       |       |         |       |       |        |       | $D_{11}^V$ | $D_{12}^V$ | $D_{21}^V$ | $D_{22}^V$ | $D_{11}^m$ | $D_{12}^m$ | $D_{21}^m$ | $D_{22}^m$ | $D_{11}^M$ | $D_{12}^M$ | $D_{21}^M$ | $D_{22}^M$ |
| 1  | 0.12  | 0.59  | 978.30  | 15.22 | 58.17 | 132.36 | 74.53 | 3.18       | 0.04       | -0.48      | 2.79       | 3.17       | 0.01       | -1.43      | 2.81       | 3.28       | 0.11       | -0.65      | 2.69       |
| 2  | 0.35  | 0.41  | 1003.19 | 16.51 | 57.52 | 132.44 | 61.15 | 3.44       | 0.21       | 0.06       | 2.05       | 3.45       | 0.02       | 0.18       | 2.04       | 3.74       | 0.62       | -0.80      | 1.75       |
| 3  | 0.47  | 0.52  | 866.59  | 16.68 | 57.73 | 131.12 | 39.17 | 6.37       | 0.62       | -0.35      | 3.62       | 6.27       | -0.03      | -1.05      | 3.71       | 8.25       | 2.24       | -3.97      | 1.74       |
| 4  | 0.50  | 0.47  | 895.80  | 16.88 | 57.73 | 131.26 | 39.42 | 6.41       | 4.07       | -0.99      | 1.91       | 6.10       | 0.93       | -2.94      | 2.21       | 11.85      | 6.90       | -8.42      | -3.53      |
| 5  | 0.57  | 0.22  | 1033.38 | 17.38 | 56.43 | 132.21 | 50.08 | 2.94       | 0.94       | 0.06       | 1.72       | 2.94       | 0.26       | 0.18       | 1.72       | 3.34       | 1.15       | -0.52      | 1.32       |
| 6  | 0.57  | 0.31  | 975.82  | 17.31 | 56.83 | 131.77 | 43.30 | 5.02       | 4.41       | -0.63      | 1.29       | 4.82       | 1.23       | -1.69      | 1.49       | 8.46       | 5.55       | -4.96      | -2.16      |
| 7  | 0.57  | 0.42  | 885.42  | 17.14 | 57.22 | 131.13 | 35.11 | 5.56       | 2.74       | -0.46      | 2.95       | 5.37       | 0.61       | -1.30      | 3.14       | 9.00       | 4.36       | -5.07      | -0.49      |
| 8  | 0.58  | 0.39  | 900.05  | 17.22 | 57.10 | 131.25 | 36.19 | 6.10       | 2.43       | -0.66      | 3.07       | 5.85       | 0.48       | -1.89      | 3.32       | 9.53       | 4.28       | -5.54      | -0.36      |
| 9  | 0.61  | 0.34  | 930.46  | 17.36 | 56.86 | 131.35 | 36.49 | 5.33       | 1.45       | -0.37      | 3.16       | 5.19       | 0.26       | -1.00      | 3.30       | 7.26       | 2.61       | -3.24      | 1.23       |
| 10 | 0.66  | 0.26  | 974.20  | 17.56 | 56.42 | 131.45 | 36.77 | 4.76       | 1.55       | -0.04      | 3.03       | 4.71       | 0.35       | -0.09      | 3.05       | 5.87       | 2.03       | -1.58      | 1.93       |
| 11 | 0.68  | 0.22  | 995.89  | 17.63 | 56.20 | 131.51 | 37.50 | 3.80       | 0.91       | -0.18      | 2.36       | 3.74       | 0.17       | -0.46      | 2.43       | 4.64       | 1.44       | -1.45      | 1.52       |
| 12 | 0.75  | 0.23  | 937.27  | 17.72 | 56.04 | 130.97 | 28.80 | 3.99       | -0.70      | 0.04       | 3.65       | 4.02       | -0.31      | 0.13       | 3.62       | 3.82       | -0.20      | 0.00       | 3.82       |
| 13 | 0.77  | 0.06  | 1067.19 | 17.81 | 55.16 | 131.60 | 39.40 | 3.19       | 0.64       | -0.23      | 1.90       | 3.12       | 0.11       | -0.58      | 1.97       | 3.67       | 1.04       | -0.96      | 1.42       |
| 14 | 0.78  | 0.18  | 968.39  | 17.81 | 55.73 | 132.00 | 29.16 | 4.20       | 0.34       | -0.31      | 3.15       | 4.06       | -0.03      | -0.80      | 3.29       | 5.18       | 1.14       | -1.84      | 2.17       |
| 15 | 0.81  | 0.13  | 1000.95 | 17.87 | 55.40 | 131.02 | 29.54 | 4.11       | -0.26      | -0.29      | 3.35       | 3.98       | -0.21      | -0.72      | 3.47       | 4.80       | 0.65       | -1.43      | 2.65       |
| 16 | 0.82  | 0.03  | 1076.84 | 17.88 | 54.85 | 131.36 | 36.01 | 3.24       | 0.14       | -0.20      | 2.13       | 3.17       | -0.08      | -0.49      | 2.20       | 3.62       | 0.76       | -0.78      | 1.75       |
| 17 | 0.85  | 0.07  | 1034.91 | 17.92 | 54.97 | 130.98 | 29.56 | 4.04       | -0.64      | -0.13      | 3.43       | 3.99       | -0.36      | -0.32      | 3.49       | 4.35       | 0.30       | -0.68      | 3.12       |
| 18 | 0.88  | 0.02  | 1059.48 | 17.95 | 54.60 | 130.95 | 29.98 | 4.14       | -0.81      | -0.22      | 3.10       | 4.05       | -0.50      | -0.52      | 3.19       | 4.65       | 0.61       | -1.01      | 2.59       |
| 19 | 0.89  | 0.10  | 965.69  | 17.95 | 54.97 | 130.53 | 22.78 | 6.05       | -0.97      | -0.11      | 5.90       | 5.99       | -0.41      | -0.27      | 5.96       | 6.28       | -0.03      | -0.59      | 5.67       |
| 20 | 0.91  | 0.07  | 987.37  | 17.97 | 54.75 | 130.51 | 22.79 | 5.84       | -1.90      | -0.83      | 4.69       | 5.32       | -0.95      | -2.02      | 5.21       | 8.40       | 1.63       | -4.86      | 2.13       |
| 21 | 0.95  | 0.02  | 1019.48 | 17.99 | 54.34 | 130.40 | 22.09 | 5.99       | -3.98      | -0.02      | 5.01       | 5.99       | -1.95      | -0.05      | 5.02       | 6.04       | -0.17      | -0.25      | 4.96       |

## 4 Acknowledgements

### References

- [1] Mialdun, A., Sechenyh, V., Legros, J. C., Ortiz de Zárate, J. M., Shevtsova, V. Investigation of Fickian diffusion in the ternary mixture of 1,2,3,4-tetrahydronaphthalene, isobutylbenzene, and dodecane, *J. Chem. Phys.*, **139**, 104903 (2013).
- [2] Sechenyh, V., Legros, J. C., Mialdun, A., Ortiz de Zárate, J. M., Shevtsova, V. Fickian Diffusion in Ternary Mixtures Composed by 1,2,3,4-Tetrahydronaphthalene, Isobutylbenzene, and n-Dodecane, *J. Phys. Chem. B*, **120**, pp. 535-548 (2016).
- [3] Grossmann, T., Winkelmann, J. Ternary Diffusion Coefficients of Cyclohexane + Toluene + Methanol by Taylor Dispersion Measurements at 298.15 K. Part 1. Toluene-Rich Area, *J. Chem. Eng. Data*, **54**, pp. 405-410 (2009).
- [4] Grossmann, T., Winkelmann, J. Ternary Diffusion Coefficients of Cyclohexane + Toluene + Methanol by Taylor Dispersion Measurements at 298.15 K. Part 2. Low Toluene Area Near the Binodal Curve, *J. Chem. Eng. Data*, **54**, pp. 485-490 (2009).
- [5] Santos, C.I., Shevtsova, V., Ribeiro, A.C., Isothermal molecular diffusion in mixtures containing toluene, cyclohexane and methanol. *Eur. Phys. J. E*, **40**, 40 (2017).
- [6] Legros, J. C., Gaponenko, Y., Mialdun, A., Triller, T., Hammon, A., Bauer, C., Köhler, W., Shevtsova V. Investigation of Fickian diffusion in the ternary mixtures of waterethanoltriethylene glycol and its binary pairs, *Phys. Chem. Chem. Phys.*, **17**, pp. 27713-27725 (2015).
